# Supplementary material
Source: publisher site journal article supplement (https://www.dovepress.com/article/395938)
Supplement: Supplementary file 1 [file get_supplementary_file.php]

**Supplemental Material**

**Supplementary Methods:**

**The Details of Polysomnography**

The study was conducted in an accredited sleep laboratory. In the sleep lab, the sleep schedule was regulated, with a “lights-out” time of 12:00 pm and a “lights-on” time of 8:00 am. Participants were not permitted to sleep before lights-out time or sleep past lights-on time. Polysomnography (PSG) consisted of electroencephalograms (C4-A1, O2-A1), right and left electrooculograms, electrocardiogram (ECG), submental and anterior tibial electromyograms, thoracic and abdominal respiratory movements, pulse oxygen saturation, end-tidal and transcutaneous carbon dioxide, oronasal airflow, and nasal pressure. Studies were recorded on an E-series Sleep System (Compumedics, Melbourne, VIC, Australia) and included digital video and audio monitoring.

Studies were scored at a centralized sleep reading center (People’s Hospital of Xinjiang Uygur Autonomous Region, Urumqi, Xinjiang, China) by registered polysomnographic technologists. Sleep and arousals were staged using standard criteria [1]. Sleep stages were scored using 30-s epochs according to Rechtschaffen and Kales criteria [2, 3], and sleep architecture variables were noted as percent total sleep time for stages NREM 1, NREM 2, NREM 3, and REM sleep. Arousals were scored according to published guidelines and summarized as the total number of arousals per hour of sleep (arousal index) [4].

To enable the calculation of alternative definitions of the apnea-hypopnea index (AHI), respiratory events were initially identified by changes in signal amplitude only. Specifically, apneas were identified as complete reductions in the thermocouple signal for ≥10 seconds and hypopneas as approximately 30% reductions in the nasal pressure or inductance signals for ≥10 seconds. Each event was annotated as to its associated oxygen saturation nadir and whether it resulted in an EEG arousal.

Definitions of respiratory events.

| Term | Definition |
| --- | --- |
| Apnea | Apnoea was defined as a 90% decrease in airflow lasting for at least 10 seconds. |
| Hypopnea | Hypopneas were defined by ≥ 30% decrement in the amplitude of nasal pressure flow signal for at least 10 seconds, associated with a 4% arterial oxygen desaturation (with or without arousal). |
| AHI | Apnea-hypopnea index = the number of apneas and hypopneas per hours of sleep |

**References**

[1] Berry RB, Budhiraja R, Gottlieb DJ, et al. Rules for scoring respiratory events in sleep: update of the 2007 AASM Manual for the Scoring of Sleep and Associated Events. Deliberations of the Sleep Apnea Definitions Task Force of the American Academy of Sleep Medicine. *J Clin Sleep Med*. 2012;8:597-619.

[2] Rechtschaffen A, Kales A (1968) A manual of standardized terminology, techniques and scoring system for sleep stages of human subjects. National Institutes of Health, Washington DC.

[3] Iber C, Ancoli-Israel S, Chesson A (2007) The AASM manual for the scoring of sleep and associated events: rules, terminology, and technical specifications, 1st edn. American Academy of Sleep Medicine, Westchester.

[4] Amerian Academy of Sleep Medicine (1992). EEG arousals: scoring rules and examples: a preliminary report from the Sleep Disorders Atlas Task Force of the American Sleep Disorders Association. Sleep, 15(2), 173-84.

**The Details of outcome events**

In our study, CVD included two categories: CHD and stroke.

CHD was defined as a fatal or nonfatal myocardial infarction, unstable anginal, coronary revascularization (coronary artery bypass grafting or percutaneous transluminal coronary angioplasty). Myocardial infarction diagnosis required an increase in cardiac enzymes with 1 of the following symptoms: ischemic chest pain, evolutionary ST-T segment changes, or new Q waves(1). The diagnosis of unstable angina requires hospitalization or outpatient follow-up, and according to Braunwald's diagnosis, must meets at least one of the following eligibility criteria:Occurring at rest or minimal exertion and usually lasting > 20 min (if not interrupted with nitroglycerine administration); Being new-onset (within 1 month) and severe and described as frank pain Occurring with a crescendo pattern (more severe, prolonged, or frequent than before); in the absence of signs of ST-segment elevation myocardial infarction (STEMI) in left-sided, right-sided, and posterior ECG, and/or positive cardiac biomarkers.

Stroke(ischemic and hemorrhagic strokes) was defined as a rapid or sudden onset fixed neurologic deficit of at least 24h or until death.

We have also added these detailed instructions in supplementary material.

[1] Myocardial infarction redefined--a consensus document of The Joint European Society of Cardiology/American College of Cardiology Committee for the redefinition of myocardial infarction.EUROPEAN HEART JOURNAL.2000;21 (18)：1502-13.

**Supplemental Table 1.** Collinearity diagnostics steps.

|  | Step 1 | Step 2 |
| --- | --- | --- |
| METS-IR | 20.3 | 1.7 |
| Sex | 2.1 | 2.1 |
| Age | 1.5 | 1.5 |
| Diabetes | 1.7 | 1.7 |
| Smoking status | 1.6 | 1.6 |
| Drinking status | 1.5 | 1.5 |
| BMI | 13.2 | NA |
| SBP | 2.2 | 2.2 |
| DBP | 2.4 | 2.4 |
| eGFR | 1.3 | 1.3 |
| Creatinine | 1.7 | 1.7 |
| BUN | 1.3 | 1.3 |
| TC | 1.9 | 1.9 |
| TG | 3.0 | 1.4 |
| HDL-C | 5.1 | NA |
| LDL-C | 1.7 | 1.7 |
| FPG | 2.1 | 1.8 |
| AHI | 1.1 | 1.1 |
| ACEIs/ARBs | 1.0 | 1.0 |
| β-blockers | 1.0 | 1.0 |
| CCBs | 1.0 | 1.0 |
| Diuretics | 1.0 | 1.0 |
| Aspirins | 1.0 | 1.0 |
| Statins | 1.0 | 1.0 |
| OSA therapy | 1.1 | 1.1 |

VIF: variance inflation factors.

VIF = 1/(1-R2). VIF step-by-step screening method: Calculate the VIF of each variable. If the maximum VIF value ≥5, remove the variable with the maximum VIF value.

**Supplemental Table 2.** Hazard ratio (95% CI) of cardiovascular disease, coronary heart disease, and stroke according to quartiles of METS-IR.

| Exposure | Model 1 | Model 2 | Model 3 |
| --- | --- | --- | --- |
| Quartiles of METS-IR | (HR, 95% CI) | (HR, 95% CI) | (HR, 95% CI) |
| Cardiovascular disease |  |  |  |
| Q1 | Reference | Reference | Reference |
| Q2 | 1.09 (0.74, 1.61) | 1.10 (0.74, 1.63) | 1.00 (0.68, 1.47) |
| Q3 | 1.57 (1.10, 2.26) | 1.52 (1.06, 2.18) | 1.50 (1.05, 2.14) |
| Q4 | 2.09 (1.47, 2.98) | 2.06 (1.44, 2.96) | 1.87 (1.33, 2.62) |
| Coronary heart disease |  |  |  |
| Q1 | Reference | Reference | Reference |
| Q2 | 1.22 (0.74, 2.01) | 1.22 (0.74, 2.02) | 1.14 (0.70, 1.86) |
| Q3 | 1.75 (1.10, 2.79) | 1.63 (1.02, 2.60) | 1.69 (1.07, 2.66) |
| Q4 | 2.33 (1.47, 3.69) | 2.23 (1.40, 3.56) | 2.08 (1.34, 3.22) |
| Stroke |  |  |  |
| Q1 | Reference | Reference | Reference |
| Q2 | 0.90 (0.48, 1.70) | 0.94 (0.50, 1.77) | 0.82 (0.44, 1.52) |
| Q3 | 1.35 (0.76, 2.40) | 1.37 (0.77, 2.45) | 1.25 (0.71, 2.21) |
| Q4 | 1.83 (1.04, 3.20) | 1.89 (1.07, 3.34) | 1.59 (0.93, 2.71) |

Model 1: adjusted for age and sex.

Model 2: adjusted for variables in model 1 plus drinking status, history of diabetes, smoking status, DBP, and SBP.

Model 3: adjusted for variables in model 2 plus eGFR, TC, LDL-C, FPG, AHI, ACEIs/ARBs, β-Blockers, CCBs, diuretics,and OSA therapy.

HR, hazard ratio; CI, confidence interval; METS-IR, metabolic score for insulin resistance.

**Supplemental Table 3.** Hazard ratios (95% CI) for cardiovascular disease, coronary heart disease, and stroke stratified by METS-IR, excluding current smokers.

| Exposure | Model 1 | Model 2 | Model 3 |
| --- | --- | --- | --- |
| (HR, 95% CI) | (HR, 95% CI) | (HR, 95% CI) |
| Cardiovascular disease |  |  |  |
| Per SD increment | 1.36 (1.17, 1.58) | 1.38 (1.18, 1.61) | 1.32 (1.14, 1.53) |
| Tertiles |  |  |  |
| T1 | Reference | Reference | Reference |
| T2 | 1.75 (1.17, 2.63) | 1.75 (1.16, 2.62) | 1.64 (1.10, 2.44) |
| T3 | 2.43 (1.64, 3.59) | 2.48 (1.67, 3.69) | 2.21 (1.52, 3.22) |
| Categories |  |  |  |
| T1-2 | Reference | Reference | Reference |
| T3 | 1.82 (1.33, 2.48) | 1.86 (1.36, 2.55) | 1.72 (1.28, 2.33) |
| Coronary heart disease |  |  |  |
| Per SD increment | 1.36 (1.12, 1.66) | 1.37 (1.12, 1.68) | 1.34 (1.11, 1.62) |
| Tertiles |  |  |  |
| T1 | Reference | Reference | Reference |
| T2 | 1.54 (0.91, 2.62) | 1.52 (0.90, 2.59) | 1.46 (0.87, 2.47) |
| T3 | 2.28 (1.38, 3.78) | 2.27 (1.36, 3.78) | 2.10 (1.30, 3.41) |
| Categories |  |  |  |
| T1-2 | Reference | Reference | Reference |
| T3 | 1.84 (1.22, 2.76) | 1.84 (1.21, 2.79) | 1.74 (1.18, 2.58) |
| Stroke |  |  |  |
| Per SD increment | 1.37 (1.08, 1.73) | 1.41 (1.12, 1.79) | 1.30 (1.04, 1.63) |
| Tertiles |  |  |  |
| T1 | Reference | Reference | Reference |
| T2 | 2.10 (1.11, 3.97) | 2.15 (1.13, 4.08) | 1.92 (1.02, 3.59) |
| T3 | 2.72 (1.46, 5.08) | 2.96 (1.58, 5.55) | 2.39 (1.31, 4.37) |
| Categories |  |  |  |
| T1-2 | Reference | Reference | Reference |
| T3 | 1.83 (1.13, 2.96) | 1.96 (1.21, 3.18) | 1.69 (1.06, 2.70) |

Model 1: adjusted for age and sex.

Model 2: adjusted for variables in model 1 plus drinking status, history of diabetes, DBP, and SBP.

Model 3: adjusted for variables in model 2 plus eGFR, TC, LDL-C, FPG, AHI, ACEIs/ARBs, β-Blockers, CCBs, diuretics,and OSA therapy.

HR, hazard ratio; CI, confidence interval; METS-IR, metabolic score for insulin resistance.

**Supplemental Table 4.** Hazard ratios (95% CI) for cardiovascular disease, coronary heart disease, and stroke stratified by METS-IR, excluding current drinkers.

| Exposure | Model 1 | Model 2 | Model 3 |
| --- | --- | --- | --- |
| (HR, 95% CI) | (HR, 95% CI) | (HR, 95% CI) |
| Cardiovascular disease |  |  |  |
| Per SD increment | 1.42 (1.23, 1.65) | 1.44 (1.24, 1.67) | 1.39 (1.21, 1.60) |
| Tertiles |  |  |  |
| T1 | Reference | Reference | Reference |
| T2 | 1.49 (0.99, 2.23) | 1.44 (0.96, 2.16) | 1.46 (0.98, 2.18) |
| T3 | 2.65 (1.82, 3.88) | 2.65 (1.81, 3.90) | 2.44 (1.70, 3.50) |
| Categories |  |  |  |
| T1-2 | Reference | Reference | Reference |
| T3 | 2.16 (1.60, 2.91) | 2.19 (1.62, 2.97) | 2.01 (1.52, 2.68) |
| Coronary heart disease |  |  |  |
| Per SD increment | 1.46 (1.21, 1.76) | 1.44 (1.19, 1.74) | 1.45 (1.21, 1.72) |
| Tertiles |  |  |  |
| T1 | Reference | Reference | Reference |
| T2 | 1.25 (0.74, 2.10) | 1.17 (0.69, 1.97) | 1.24 (0.74, 2.08) |
| T3 | 2.52 (1.57, 4.06) | 2.35 (1.45, 3.81) | 2.36 (1.51, 3.71) |
| Categories |  |  |  |
| T1-2 | Reference | Reference | Reference |
| T3 | 2.26 (1.54, 3.32) | 2.18 (1.47, 3.22) | 2.13 (1.48, 3.06) |
| Stroke |  |  |  |
| Per SD increment | 1.38 (1.09, 1.74) | 1.44 (1.14, 1.82) | 1.32 (1.05, 1.64) |
| Tertiles |  |  |  |
| T1 | Reference | Reference | Reference |
| T2 | 1.96 (1.02, 3.77) | 1.99 (1.03, 3.83) | 1.86 (0.98, 3.54) |
| T3 | 2.94 (1.56, 5.51) | 3.27 (1.73, 6.17) | 2.57 (1.40, 4.72) |
| Categories |  |  |  |
| T1-2 | Reference | Reference | Reference |
| T3 | 2.02 (1.25, 3.26) | 2.24 (1.38, 3.62) | 1.84 (1.16, 2.92) |

Model 1: adjusted for age and sex.

Model 2: adjusted for variables in model 1 plus smoking status, history of diabetes, DBP, and SBP.

Model 3: adjusted for variables in model 2 plus eGFR, TC, LDL-C, FPG, AHI, ACEIs/ARBs, β-Blockers, CCBs, diuretics,and OSA therapy.

HR, hazard ratio; CI, confidence interval; METS-IR, metabolic score for insulin resistance.

**Supplemental Table 5.** Hazard ratios (95% CI) for cardiovascular disease, coronary heart disease, and stroke stratified by METS-IR, excluding patients on OSA therapy.

| Exposure | Model 1 | Model 2 | Model 3 |
| --- | --- | --- | --- |
| (HR, 95% CI) | (HR, 95% CI) | (HR, 95% CI) |
| Cardiovascular disease |  |  |  |
| Per SD increment | 1.38 (1.21, 1.56) | 1.37 (1.20, 1.56) | 1.32 (1.17, 1.49) |
| Tertiles |  |  |  |
| T1 | Reference | Reference | Reference |
| T2 | 1.46 (1.03, 2.06) | 1.42 (1.00, 2.00) | 1.36 (0.97, 1.91) |
| T3 | 2.47 (1.78, 3.43) | 2.39 (1.71, 3.32) | 2.18 (1.59, 2.98) |
| Categories |  |  |  |
| T1-2 | Reference | Reference | Reference |
| T3 | 2.02 (1.56, 2.61) | 1.97 (1.52, 2.56) | 1.86 (1.45, 2.38) |
| Coronary heart disease |  |  |  |
| Per SD increment | 1.39 (1.19, 1.63) | 1.36 (1.15, 1.60) | 1.34 (1.15, 1.55) |
| Tertiles |  |  |  |
| T1 | Reference | Reference | Reference |
| T2 | 1.39 (0.91, 2.13) | 1.33 (0.87, 2.04) | 1.34 (0.88, 2.03) |
| T3 | 2.34 (1.55, 3.52) | 2.11 (1.40, 3.20) | 2.07 (1.40, 3.05) |
| Categories |  |  |  |
| T1-2 | Reference | Reference | Reference |
| T3 | 1.95 (1.41, 2.70) | 1.81 (1.30, 2.52) | 1.78 (1.30, 2.42) |
| Stroke |  |  |  |
| Per SD increment | 1.37 (1.11, 1.69) | 1.41 (1.14, 1.74) | 1.29 (1.06, 1.59) |
| Tertiles |  |  |  |
| T1 | Reference | Reference | Reference |
| T2 | 1.61 (0.89, 2.90) | 1.65 (0.91, 2.96) | 1.41 (0.79, 2.51) |
| T3 | 2.80 (1.61, 4.85) | 2.99 (1.72, 5.19) | 2.40 (1.41, 4.08) |
| Categories |  |  |  |
| T1-2 | Reference | Reference | Reference |
| T3 | 2.17 (1.42, 3.33) | 2.29 (1.49, 3.52) | 2.00 (1.33, 3.03) |

Model 1: adjusted for age and sex.

Model 2: adjusted for variables in model 1 plus drinking status, history of diabetes, smoking status, DBP, and SBP.

Model 3: adjusted for variables in model 2 plus eGFR, TC, LDL-C, FPG, AHI, ACEIs/ARBs, β-Blockers, CCBs,and diuretics.

HR, hazard ratio; CI, confidence interval; OSA, obstructive sleep apnea; METS-IR, metabolic score for insulin resistance.

**Supplemental Table 6.** Hazard ratios (95% CI) for cardiovascular disease, coronary heart disease, and stroke were stratified by METS-IR, excluding participants with cardiovascular disease occurring within the first two years of the follow-up.

| Exposure | Model 1 | Model 2 | Model 3 |
| --- | --- | --- | --- |
| (HR, 95% CI) | (HR, 95% CI) | (HR, 95% CI) |
| Cardiovascular disease |  |  |  |
| Per SD increment | 1.36 (1.19, 1.55) | 1.36 (1.18, 1.56) | 1.31 (1.15, 1.49) |
| Tertiles |  |  |  |
| T1 | Reference | Reference | Reference |
| T2 | 1.25 (0.86, 1.80) | 1.22 (0.84, 1.76) | 1.20 (0.84, 1.73) |
| T3 | 2.33 (1.66, 3.29) | 2.30 (1.62, 3.25) | 2.10 (1.52, 2.92) |
| Categories |  |  |  |
| T1-2 | Reference | Reference | Reference |
| T3 | 2.08 (1.58, 2.72) | 2.07 (1.57, 2.72) | 1.91 (1.47, 2.48) |
| Coronary heart disease |  |  |  |
| Per SD increment | 1.38 (1.17, 1.64) | 1.36 (1.14, 1.63) | 1.34 (1.14, 1.58) |
| Tertiles |  |  |  |
| T1 | Reference | Reference | Reference |
| T2 | 1.18 (0.74, 1.88) | 1.15 (0.72, 1.83) | 1.20 (0.76, 1.89) |
| T3 | 2.23 (1.44, 3.45) | 2.07 (1.33, 3.22) | 2.04 (1.35, 3.08) |
| Categories |  |  |  |
| T1-2 | Reference | Reference | Reference |
| T3 | 2.04 (1.44, 2.88) | 1.92 (1.35, 2.74) | 1.86 (1.33, 2.59) |
| Stroke |  |  |  |
| Per SD increment | 1.32 (1.07, 1.64) | 1.37 (1.10, 1.71) | 1.26 (1.02, 1.55) |
| Tertiles |  |  |  |
| T1 | Reference | Reference | Reference |
| T2 | 1.36 (0.75, 2.49) | 1.39 (0.76, 2.54) | 1.22 (0.67, 2.21) |
| T3 | 2.56 (1.47, 4.45) | 2.76 (1.58, 4.83) | 2.22 (1.30, 3.78) |
| Categories |  |  |  |
| T1-2 | Reference | Reference | Reference |
| T3 | 2.17 (1.40, 3.37) | 2.33 (1.49, 3.62) | 2.00 (1.31, 3.06) |

Model 1: adjusted for age and sex.

Model 2: adjusted for variables in model 1 plus drinking status, history of diabetes, smoking status, DBP, and SBP.

Model 3: adjusted for variables in model 2 plus eGFR, TC, LDL-C, FPG, AHI, ACEIs/ARBs, β-Blockers, CCBs, diuretics,and OSA therapy.

HR, hazard ratio; CI, confidence interval; METS-IR, metabolic score for insulin resistance.

**Supplemental Table 7.** Competing risk models for the association of METS-IR with cardiovascular disease, coronary heart disease, and stroke.

| Exposure | Model 1 | Model 2 | Model 3 |
| --- | --- | --- | --- |
| (SHR, 95% CI) | (SHR, 95% CI) | (SHR, 95% CI) |
| Cardiovascular disease |  |  |  |
| Per SD increment | 1.26 (1.11, 1.43) | 1.25 (1.10, 1.42) | 1.22 (1.08, 1.38) |
| Tertiles |  |  |  |
| T1 | Reference | Reference | Reference |
| T2 | 1.18 (0.84, 1.66) | 1.17 (0.83, 1.64) | 1.15 (0.82, 1.61) |
| T3 | 1.91 (1.38, 2.63) | 1.86 (1.35, 2.58) | 1.75 (1.28, 2.38) |
| Categories |  |  |  |
| T1-2 | Reference | Reference | Reference |
| T3 | 1.72 (1.32, 2.23) | 1.69 (1.30, 2.20) | 1.60 (1.24, 2.06) |
| Coronary heart disease |  |  |  |
| Per SD increment | 1.26 (1.07, 1.48) | 1.24 (1.05, 1.46) | 1.22 (1.05, 1.42) |
| Tertiles |  |  |  |
| T1 | Reference | Reference | Reference |
| T2 | 0.97 (0.64, 1.47) | 0.96 (0.63, 1.46) | 0.97 (0.64, 1.46) |
| T3 | 1.73 (1.17, 2.54) | 1.64 (1.11, 2.43) | 1.58 (1.09, 2.29) |
| Categories |  |  |  |
| T1-2 | Reference | Reference | Reference |
| T3 | 1.72 (1.24, 2.37) | 1.63 (1.18, 2.27) | 1.57 (1.15, 2.14) |
| Stroke |  |  |  |
| Per SD increment | 1.27 (1.03, 1.58) | 1.29 (1.03, 1.60) | 1.23 (0.99, 1.52) |
| Tertiles |  |  |  |
| T1 | Reference | Reference | Reference |
| T2 | 1.76 (0.97, 3.20) | 1.77 (0.97, 3.21) | 1.62 (0.90, 2.92) |
| T3 | 2.41 (1.35, 4.28) | 2.46 (1.38, 4.41) | 2.17 (1.24, 3.81) |
| Categories |  |  |  |
| T1-2 | Reference | Reference | Reference |
| T3 | 1.75 (1.13, 2.72) | 1.78 (1.14, 2.78) | 1.66 (1.08, 2.55) |

Model 1: adjusted for age and sex.

Model 2: adjusted for variables in model 1 plus drinking status, history of diabetes, smoking status, DBP, and SBP.

Model 3: adjusted for variables in model 2 plus eGFR, TC, LDL-C, FPG, AHI, ACEIs/ARBs, β-Blockers, CCBs, diuretics,and OSA therapy.

SHR, sub-distribution hazard ratio; CI, confidence interval; METS-IR, metabolic score for insulin resistance.
